# Supplementary material for: 2-Aminoacrylate stress damages diverse PLP-dependent enzymes in vivo
Source: PubMed Central journal article supplement (PMC9127364; doi:10.1016/j.jbc.2022.101970), 2022-04-20
Supplement: mmc1.pdf [file mmc1.pdf]

## SUPPORTING INFORMATION

2-Aminoacrylate stress damages diverse PLP-dependent enzymes *in vivo*

Wangchen Shen, Andrew J. Borchert, and Diana M. Downs

Table S1

Figure S1

Figure S2

Figure S3

### Literature Cited.

1. McKinney, J., et al., *Tightly regulated gene expression system in Salmonella enterica serovar Typhimurium*. J. Bacteriol., 2002. **184**(21): p. 6056-9.
2. Way, J.C., et al., *New Tn10 derivatives for transposon mutagenesis and for construction of lacZ operon fusions by transposition*. Gene, 1984. **32**(3): p. 369-379.



TABLE S1. Bacterial strains, plasmids, and primers

| Strain               | Genotype                                                                                |
|----------------------|-----------------------------------------------------------------------------------------|
| DM10000              | <i>Salmonella enterica</i> LT2 (Wildtype)                                               |
| DM13509 <sup>1</sup> | <i>aadA::araC-P<sub>BAD</sub>-T7pol<sup>+</sup> xyL rpsL</i>                            |
| DM17050              | <i>aadA::araC-P<sub>BAD</sub>-T7pol<sup>+</sup> xyL rpsL ridA1::Tn10(d)<sup>2</sup></i> |
| DM17051              | <i>aadA::araC-P<sub>BAD</sub>-T7pol<sup>+</sup> xyL rpsL ridA1::Tn10(d) / pDM1602</i>   |
| DM17053              | <i>aadA::araC-P<sub>BAD</sub>-T7pol<sup>+</sup> xyL rpsL ridA1::Tn10(d) / pDM1507</i>   |
| DM17181              | <i>aadA::araC-P<sub>BAD</sub>-T7pol<sup>+</sup> xyL rpsL pDM1507</i>                    |
| DM17182              | <i>aadA::araC-P<sub>BAD</sub>-T7pol<sup>+</sup> xyL rpsL pDM1504</i>                    |
| DM17183              | <i>aadA::araC-P<sub>BAD</sub>-T7pol<sup>+</sup> xyL rpsL ridA1::Tn10(d) / pDM1504</i>   |
| DM17184              | <i>aadA::araC-P<sub>BAD</sub>-T7pol<sup>+</sup> xyL rpsL / pDM1505</i>                  |
| DM17185              | <i>aadA::araC-P<sub>BAD</sub>-T7pol<sup>+</sup> xyL rpsL ridA1::Tn10(d) / pDM1505</i>   |
| DM17186              | <i>aadA::araC-P<sub>BAD</sub>-T7pol<sup>+</sup> xyL rpsL /pDM1506</i>                   |
| DM17187              | <i>aadA::araC-P<sub>BAD</sub>-T7pol<sup>+</sup> xyL rpsL ridA1::Tn10(d) / pDM1506</i>   |
| DM17292              | <i>aadA::araC-P<sub>BAD</sub>-T7pol<sup>+</sup> xyL rpsL / pDM1579</i>                  |
| DM17293              | <i>aadA::araC-P<sub>BAD</sub>-T7pol<sup>+</sup> xyL rpsL ridA1::Tn10(d) / pDM1579</i>   |
| DM17294              | <i>aadA::araC-P<sub>BAD</sub>-T7pol<sup>+</sup> xyL rpsL / pDM1577</i>                  |
| DM17295              | <i>aadA::araC-P<sub>BAD</sub>-T7pol<sup>+</sup> xyL rpsL ridA1::Tn10(d) / pDM1577</i>   |
| DM17296              | <i>aadA::araC-P<sub>BAD</sub>-T7pol<sup>+</sup> xyL rpsL / pDM1578</i>                  |
| DM17297              | <i>aadA::araC-P<sub>BAD</sub>-T7pol<sup>+</sup> xyL rpsL ridA1::Tn10(d) / pDM1578</i>   |
| Plasmid              | Description                                                                             |
| pDM1578              | pET20b- <i>ilvA</i>                                                                     |
| pDM1602              | pET20b- <i>alr</i> (wildtype)                                                           |
| pDM1504              | pET20b- <i>alr57</i> (R209E)                                                            |
| pDM1505              | pET20b- <i>alr56</i> (R209A)                                                            |
| pDM1506              | pET20b- <i>alr55</i> (R209D)                                                            |
| pDM1507              | pET20b- <i>alr54</i> (R209S)                                                            |
| pDM1577              | pET28b- <i>ilvE</i>                                                                     |

Table S1 (cont)

| Primer                 | Sequence                                         |
|------------------------|--------------------------------------------------|
| LT2_ <i>alr</i> _R209D | 5'-agtctcactttgactgggcgGATccgggcatcattttgatgg-3' |
| LT2_ <i>alr</i> _R209A | 5'-agtctcactttgactgggcgGCGccgggcatcattttgatgg-3' |
| LT2_ <i>alr</i> _R209E | 5'-agtctcactttgactgggcgGAAccgggcatcattttgatgg-3' |
| LT2_ <i>alr</i> _R209S | 5'-agtctcactttgactgggcgAGCccgggcatcattttgatgg-3' |

<sup>1</sup>A His<sup>+</sup> derivative of the SB300AI *S. enterica* strain harboring the chromosomally borne gene for T7 polymerase under control of the arabinose-inducible P<sub>BAD</sub> promoter (*aadA::araC-P<sub>BAD</sub>-T7pol<sup>+</sup>*) [1].

<sup>2</sup>Tn10(d) refers to the transposition-defective mini-Tn10 (Tn10Δ16Δ17) [2].

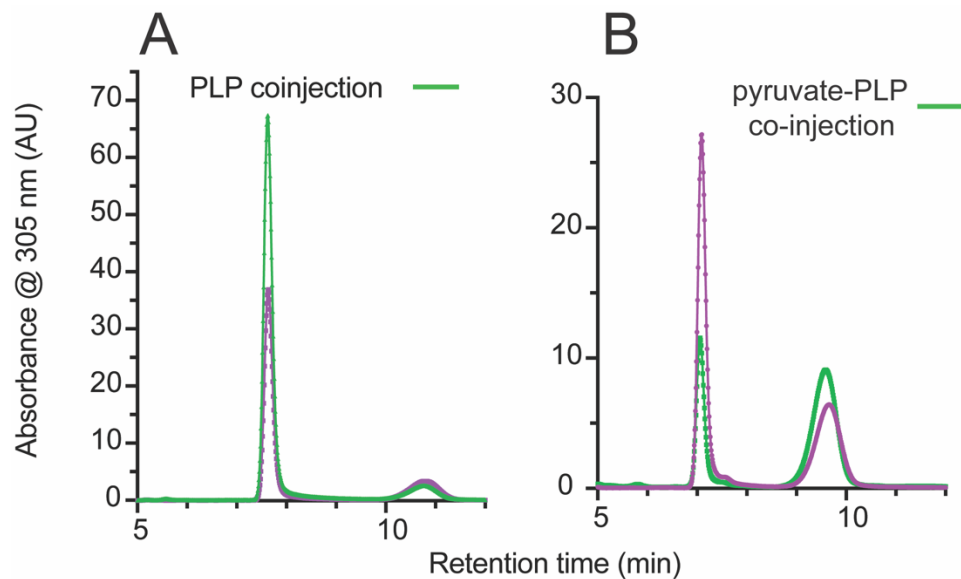

Figure S1. Assignment of peaks to PLP and pyruvate-PLP. Alr was purified from a *ridA* background, the cofactors were released from 0.4 mg of enzyme with base, and separated on HPLC as described (purple). Green chromatogram tracing shows the released cofactors with added PLP(A) or pyruvate-PLP (B). In each case the cofactors released from Alr took up half of the total volume and concentrated cofactor (PLP or PLP/pyruvate adduct) generated the other half of the volume.

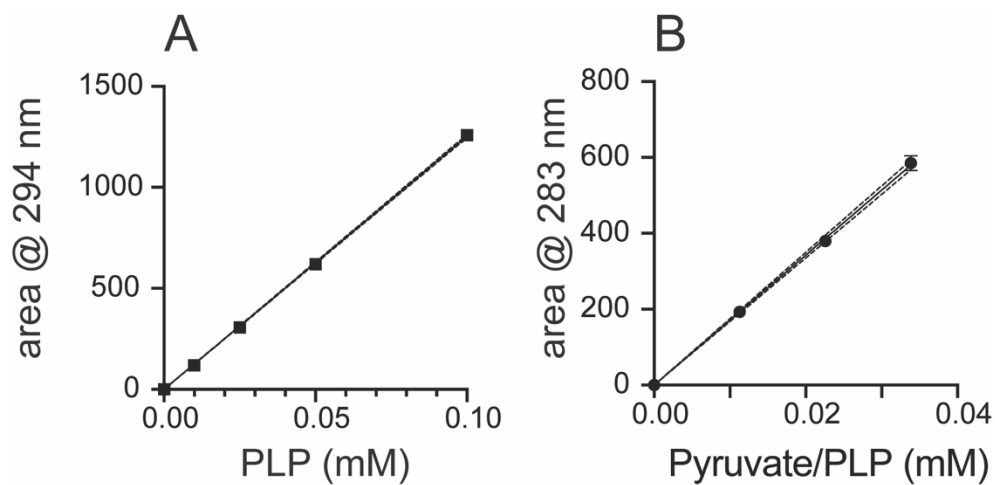

**Figure S2. Standard curve for PLP and pyruvate-PLP.** The standard curves for (A) PLP and (b) pyruvate/PLP are plotted. The y axis is the area of each peak at a known concentration and the x axis are the corresponding concentrations. The area of PLP and PLP/pyruvate are monitored at their individual absorbance maximum, which for PLP is 294nm, and for PLP/pyruvate, 283nm. (The R square value for both is greater than 0.99).

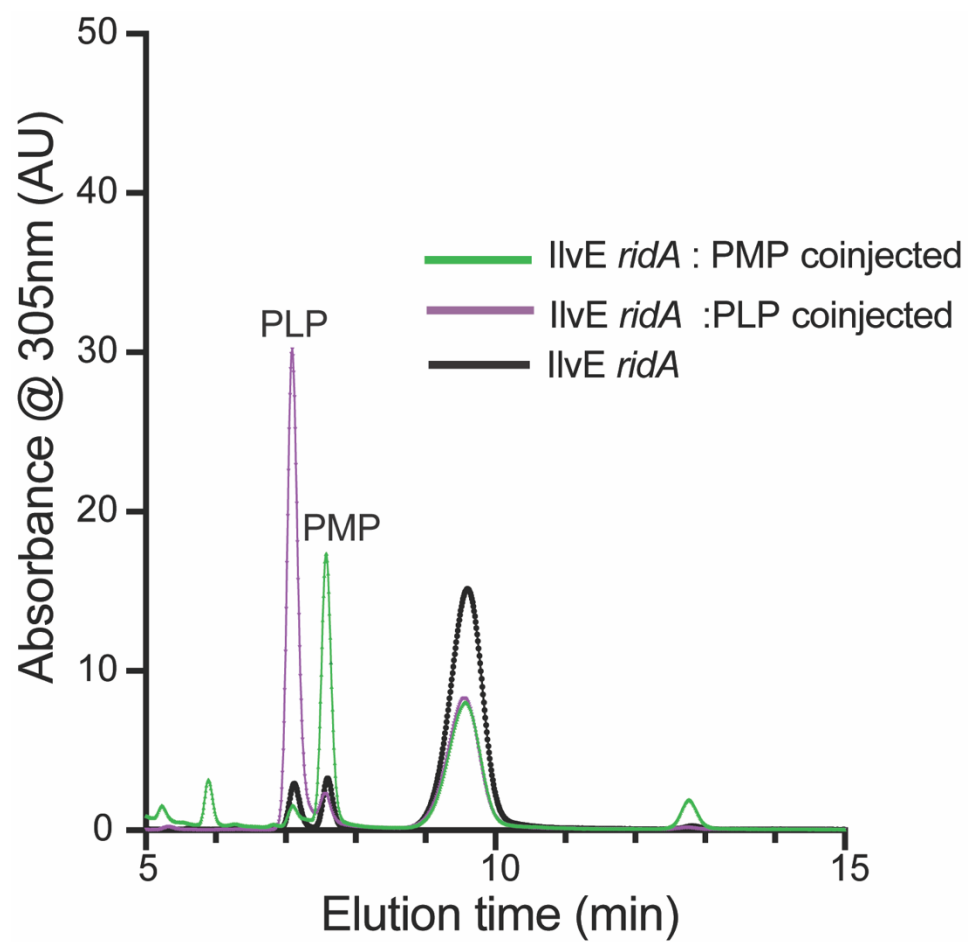

**Figure S3. Peak assignment for PMP.** The chromatogram of the cofactors released from IlvE purified from a *ridA* strain (black). The same sample including PLP (purple) or PMP (green).
